# Supplementary material
Source: Springer Nature journal article supplement (https://www.springermedizin.de/resource/supplementary/13054_2010_8822_MOESM2_ESM.pdf/9732650)
Supplement: MOESM2 [file 9732650]

Intubation

Equipment  
(catheter and probes)

Stabilisation period

**1. Baseline 1**

**2. Dobutamine**

**3. Baseline 2**

**4. Hypovolemia**

**5. Baseline 3**

**6. Hypervolemia**

**7. Acute Lung Injury \***

Preparation

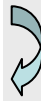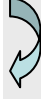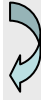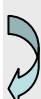

Haemorrhage

Volume restitution

Volume loading

Oleic acid IV

**Euthanasia**
